# Supplementary material for: Dynamic characterisation of the netrin-like domain of human type 1 procollagen C-proteinaseenhancer and comparison to the N-terminal domain of tissue inhibitor of metalloproteinases (TIMP)
Source: Royal Society of Chemistry journal article supplement (doi:10.1039/b717901d), 2008-02-26
Supplement: b717901d.pdf [file b717901d.pdf]

| Residue No | Residue | R1    | R2     | NOE   | S2    | te     | Rex   |
|------------|---------|-------|--------|-------|-------|--------|-------|
|            |         | s-1   | s-1    |       |       | ps     | s-1   |
| 1          | Met     |       |        |       |       |        |       |
| 2          | Cys     |       |        |       |       |        |       |
| 3          | Pro     |       |        |       |       |        |       |
| 4          | Lys     |       |        |       |       |        |       |
| 5          | Gln     |       |        |       |       |        |       |
| 6          | Cys     |       |        |       |       |        |       |
| 7          | Arg     | 1.259 | 6.596  | 0.614 | 0.66  | 46.092 | 0     |
| 8          | Arg     | 1.347 | 7.536  | 0.625 | 0.76  | 0      | 0     |
| 9          | Thr     | 1.406 | 8.224  | 0.598 | 0.79  | 0      | 0     |
| 10         | Gly     | 1.374 | 9.39   | 0.785 | 0.84  | 0      | 0     |
| 11         | Thr     |       |        |       |       |        |       |
| 12         | Leu     |       |        |       |       |        |       |
| 13         | Gln     |       |        |       |       |        |       |
| 14         | Ser     | 1.519 | 10.941 | 0.823 | 0.921 | 0      | 0     |
| 15         | Asn     |       |        |       |       |        |       |
| 16         | Phe     | 1.442 | 8.873  | 0.796 | 0.92  | 66.897 | 0     |
| 17         | Cys     | 1.431 | 7.386  | 0.763 | 0.94  | 0      | 0     |
| 18         | Ala     | 1.338 | 11.628 | 0.697 | 0.93  | 0      | 0     |
| 19         | Ser     |       |        |       |       |        |       |
| 20         | Ser     | 1.26  | 11.013 | 0.729 | 0.789 | 22.021 | 0     |
| 21         | Leu     | 1.412 | 12.24  | 0.773 | 0.903 | 0      | 1.134 |
| 22         | Val     | 1.355 | 8.224  | 0.857 | 0.89  | 0      | 0     |
| 23         | Val     | 1.432 | 11.468 | 0.845 | 0.915 | 0      | 0     |
| 24         | Thr     | 1.414 | 10.834 | 0.845 | 0.904 | 0      | 0     |
| 25         | Ala     | 1.431 | 9.066  | 0.82  | 0.914 | 0      | 0     |
| 26         | Thr     | 1.355 | 11.312 | 0.716 | 0.846 | 37.487 | 0     |
| 27         | Val     | 1.383 | 7.837  | 0.803 | 0.702 | 0      | 0     |
| 28         | Lys     | 1.463 | 5.653  | 0.775 | 0.65  | 169.27 | 0     |
| 29         | Ser     | 1.276 | 8.41   | 0.766 | 0.7   | 14.235 | 2.4   |
| 30         | Met     | 1.197 | 12.61  | 0.838 | 0.766 | 0      | 1.7   |
| 31         | Val     | 1.299 | 11.641 | 0.764 | 0.831 | 0      | 1.9   |
| 32         | Arg     | 1.352 | 9.47   | 0.847 | 0.864 | 0      | 2.1   |
| 33         | Glu     | 1.301 | 7.205  | 0.569 | 0.782 | 63.898 | 2.2   |
| 34         | Pro     |       |        |       |       |        |       |
| 35         | Gly     | 1.352 | 7.042  | 0.704 | 0.888 | 0      | 0     |
| 36         | Glu     | 1.423 | 11.223 | 0.71  | 0.91  | 57.973 | 0     |
| 37         | Gly     | 1.543 | 10.173 | 0.733 | 0.926 | 0      | 0     |
| 38         | Leu     | 1.395 | 10.204 | 0.725 | 0.91  | 42.769 | 0     |
| 39         | Ala     | 1.335 | 9.737  | 0.794 | 0.92  | 9.018  | 0     |
| 40         | Val     | 1.321 | 8.258  | 0.858 | 0.95  | 500    | 0     |
| 41         | Thr     | 1.349 | 8.865  | 0.724 | 0.943 | 33.788 | 0     |
| 42         | Val     | 1.452 | 11.123 | 0.784 | 0.947 | 500    | 0     |
| 43         | Ser     | 1.422 | 12.077 | 0.867 | 0.909 | 0      | 0     |
| 44         | Leu     | 1.431 | 8.834  | 0.756 | 0.914 | 0      | 0     |
| 45         | Ile     | 1.415 | 8.382  | 0.801 | 0.9   | 10.597 | 0     |
| 46         | Gly     | 1.29  | 9.872  | 0.84  | 0.825 | 0      | 0     |
| 47         | Ala     | 1.276 | 9.479  | 0.745 | 0.816 | 0      | 0     |
| 48         | Tyr     | 1.219 | 10.787 | 0.77  | 0.78  | 0      | 0     |
| 49         | Lys     | 1.228 | 9.823  | 0.765 | 0.785 | 0      | 0     |
| 50         | Thr     | 1.366 | 8.643  | 0.852 | 0.91  | 0      | 0     |
| 51         | Gly     | 1.447 | 9.001  | 0.745 | 0.909 | 49.267 | 0     |
| 52         | Gly     | 1.487 | 10.163 | 0.792 | 0.92  | 0      | 0     |

|     |     |       |        |       |  |       |        |       |
|-----|-----|-------|--------|-------|--|-------|--------|-------|
| 53  | Leu | 1.384 | 10.616 | 0.778 |  | 0.876 | 18.81  | 0     |
| 54  | Asp | 1.26  | 9.756  | 0.655 |  | 0.78  | 0      | 0     |
| 55  | Leu | 0.98  | 6.079  | 0.569 |  | 0.626 | 0      | 0     |
| 56  | Pro |       |        |       |  |       |        |       |
| 57  | Ser | 1.243 | 6.083  | 0.674 |  | 0.77  | 0      | 0     |
| 58  | Pro |       |        |       |  |       |        |       |
| 59  | Pro |       |        |       |  |       |        |       |
| 60  | Thr | 1.274 | 11.494 | 0.754 |  | 0.85  | 0      | 0     |
| 61  | Gly | 1.437 | 11.641 | 0.739 |  | 0.902 | 49.009 | 0     |
| 62  | Ala | 1.337 | 9.363  | 0.828 |  | 0.89  | 0      | 0     |
| 63  | Ser | 1.292 | 12.92  | 0.739 |  | 0.94  | 0      | 0     |
| 64  | Leu | 1.358 | 8.726  | 0.829 |  | 0.93  | 500    | 0     |
| 65  | Lys | 1.319 | 7.452  | 0.762 |  | 0.843 | 0      | 0     |
| 66  | Phe | 1.365 | 11.751 | 0.769 |  | 0.91  | 500    | 0     |
| 67  | Tyr |       |        |       |  |       |        |       |
| 68  | Val | 1.336 | 6.502  | 0.81  |  | 0.92  | 651.33 | 0     |
| 69  | Pro |       |        |       |  |       |        |       |
| 70  | Cys | 1.402 | 12.165 | 0.816 |  | 0.896 | 0      | 0     |
| 71  | Lys | 1.418 | 12.27  | 0.71  |  | 0.92  | 500    | 0     |
| 72  | Gln | 1.222 | 10.352 | 0.585 |  | 0.739 | 45.72  | 1.196 |
| 73  | Cys |       |        |       |  |       |        |       |
| 74  | Pro |       |        |       |  |       |        |       |
| 75  | Pro |       |        |       |  |       |        |       |
| 76  | Met | 1.098 | 10.482 | 0.649 |  | 0.702 | 0      | 1.846 |
| 77  | Lys |       |        |       |  |       |        |       |
| 78  | Lys | 1.289 | 11.416 | 0.756 |  | 0.812 | 17.684 | 0     |
| 79  | Gly | 1.396 | 7.874  | 0.82  |  | 0.85  | 0      | 0     |
| 80  | Val | 1.367 | 10.32  | 0.78  |  | 0.81  | 16.291 | 0     |
| 81  | Ser | 1.214 | 5.176  | 0.785 |  | 0.775 | 0      | 0     |
| 82  | Tyr | 1.425 | 12.18  | 0.779 |  | 0.903 | 24.04  | 0     |
| 83  | Leu | 1.44  | 10.03  | 0.777 |  | 0.911 | 28.172 | 0     |
| 84  | Leu | 1.402 | 8.85   | 0.863 |  | 0.896 | 0      | 0     |
| 85  | Met | 1.373 | 11.641 | 0.843 |  | 0.92  | 500    | 0     |
| 86  | Gly | 1.288 | 10.941 | 0.773 |  | 0.915 | 13.058 | 0     |
| 87  | Gln | 1.398 | 12.594 | 0.758 |  | 0.92  | 0      | 0     |
| 88  | Val | 1.281 | 9.872  | 0.684 |  | 0.882 | 500    | 0     |
| 89  | Glu |       |        |       |  |       |        |       |
| 90  | Glu |       |        |       |  |       |        |       |
| 91  | Asn | 1.403 | 12.706 | 0.628 |  | 0.917 | 231.58 | 0     |
| 92  | Arg | 1.083 | 8.834  | 0.645 |  | 0.795 | 23.043 | 0     |
| 93  | Gly | 1.364 | 9.234  | 0.685 |  | 0.844 | 49.336 | 0     |
| 94  | Pro |       |        |       |  |       |        |       |
| 95  | Val |       |        |       |  |       |        |       |
| 96  | Leu | 1.303 | 12.346 | 0.747 |  | 0.833 | 0      | 2.097 |
| 97  | Pro |       |        |       |  |       |        |       |
| 98  | Pro |       |        |       |  |       |        |       |
| 99  | Glu |       |        |       |  |       |        |       |
| 100 | Ser | 1.298 | 11.891 | 0.684 |  | 0.947 | 84.211 | 0     |
| 101 | Phe | 1.32  | 7.092  | 0.808 |  | 0.92  | 0      | 0     |
| 102 | Val |       |        |       |  |       |        |       |
| 103 | Val | 1.421 | 10.142 | 0.738 |  | 0.9   | 44.148 | 0     |
| 104 | Leu | 1.385 | 10.526 | 0.807 |  | 0.89  | 5.833  | 0     |
| 105 | His | 1.453 | 10.571 | 0.748 |  | 0.913 | 50.042 | 0     |
| 106 | Arg | 1.383 | 10.121 | 0.776 |  | 0.89  | 19.554 | 0     |
| 107 | Pro |       |        |       |  |       |        |       |
| 108 | Asn |       |        |       |  |       |        |       |

|     |     |       |        |       |  |       |        |   |
|-----|-----|-------|--------|-------|--|-------|--------|---|
| 109 | Gln | 1.289 | 11.521 | 0.809 |  | 0.894 | 0      | 0 |
| 110 | Asp | 1.443 | 9.497  | 0.756 |  | 0.909 | 41.491 | 0 |
| 111 | Gln | 1.367 | 10.661 | 0.773 |  | 0.88  | 0      | 0 |
| 112 | Ile | 1.344 | 12.484 | 0.778 |  | 0.93  | 0      | 0 |
| 113 | Leu | 1.426 | 11.148 | 0.754 |  | 0.898 | 37.649 | 0 |
| 114 | Thr | 1.382 | 10.288 | 0.788 |  | 0.883 | 0      | 0 |
| 115 | Asn | 1.416 | 11.521 | 0.734 |  | 0.905 | 0      | 0 |
| 116 | Leu | 1.372 | 11.074 | 0.576 |  | 0.89  | 0      | 0 |
| 117 | Ser | 1.42  | 8.292  | 0.79  |  | 0.907 | 0      | 0 |
| 118 | Lys | 1.503 | 8.019  | 0.707 |  | 0.94  | 0      | 0 |
| 119 | Arg | 1.342 | 10.526 | 0.911 |  | 0.88  | 0      | 0 |
| 120 | Lys |       |        |       |  |       |        |   |
| 121 | Cys |       |        |       |  |       |        |   |
| 122 | Pro |       |        |       |  |       |        |   |
| 123 | Ser | 1.44  | 11.351 | 0.74  |  | 0.88  | 49.56  | 0 |
| 124 | Gln | 1.247 | 6.373  | 0.002 |  | 0.638 | 139.53 | 0 |
| 125 | Pro |       |        |       |  |       |        |   |
| 126 | Val | 1.323 | 11.274 | 0.623 |  | 0.807 | 56.961 | 0 |
| 127 | Arg |       |        |       |  |       |        |   |
| 128 | Ala | 1.303 | 8.097  | 0.821 |  | 0.832 | 0      | 0 |
| 129 | Ala |       |        |       |  |       |        |   |
| 130 | Ala |       |        |       |  |       |        |   |
| 131 | Ser |       |        |       |  |       |        |   |
| 132 | Gln | 1.27  | 10.571 | 0.67  |  | 0.712 | 0      | 0 |
| 133 | Asp | 0.428 | 1.54   | 1.244 |  | 0.273 | 0      | 0 |
